# Supplementary material for: Convergent patterns of gene expression and protein evolution associated with adaptation to desert environments in rodents
Source: bioRxiv or medRxiv preprint supplement (doi:10.1101/2021.09.10.459863), 2021-09-11

Supplemental material

Figure S1. Benchmarking Using Single Copy Orthologs (BUSCO) score for each of the transcriptome assemblies

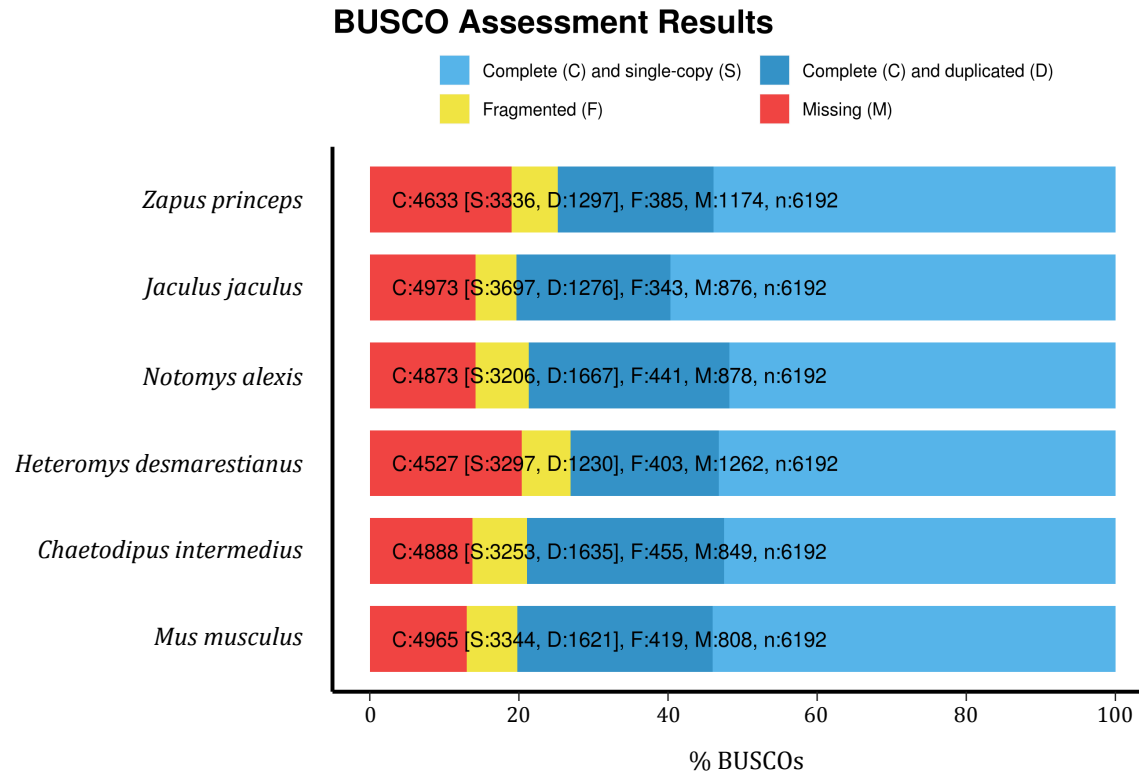

**Figure S2.** Genes that are differentially expressed between each desert and non-desert comparisons within each family and the overlaps among families.

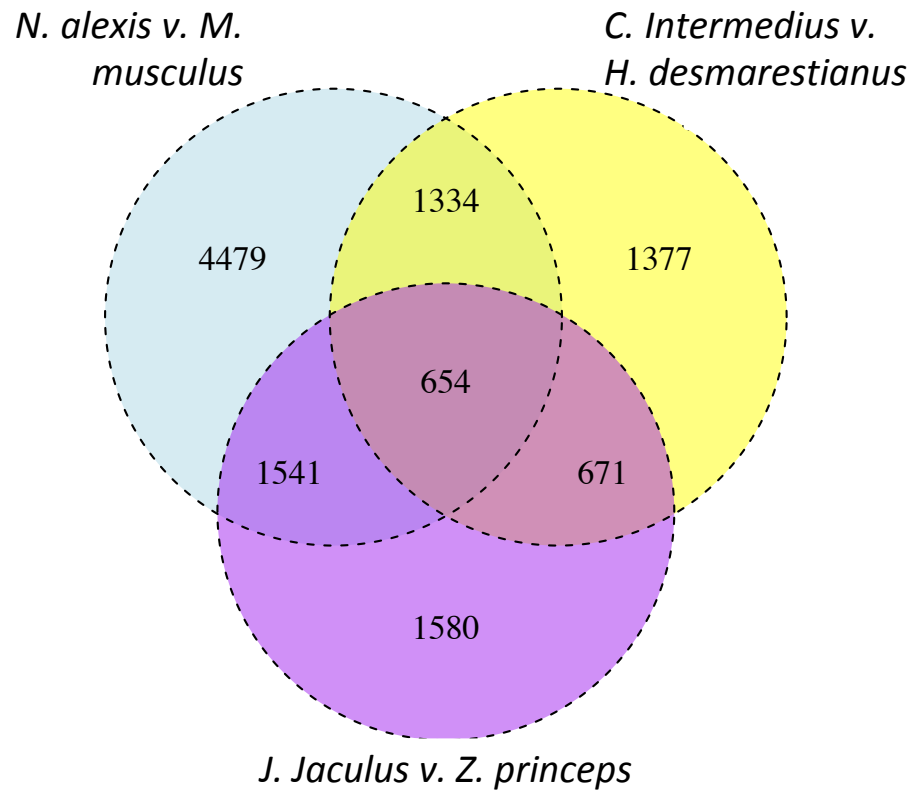

**Figure S3.** Magnitude of expression differences between each desert-mesic species pair

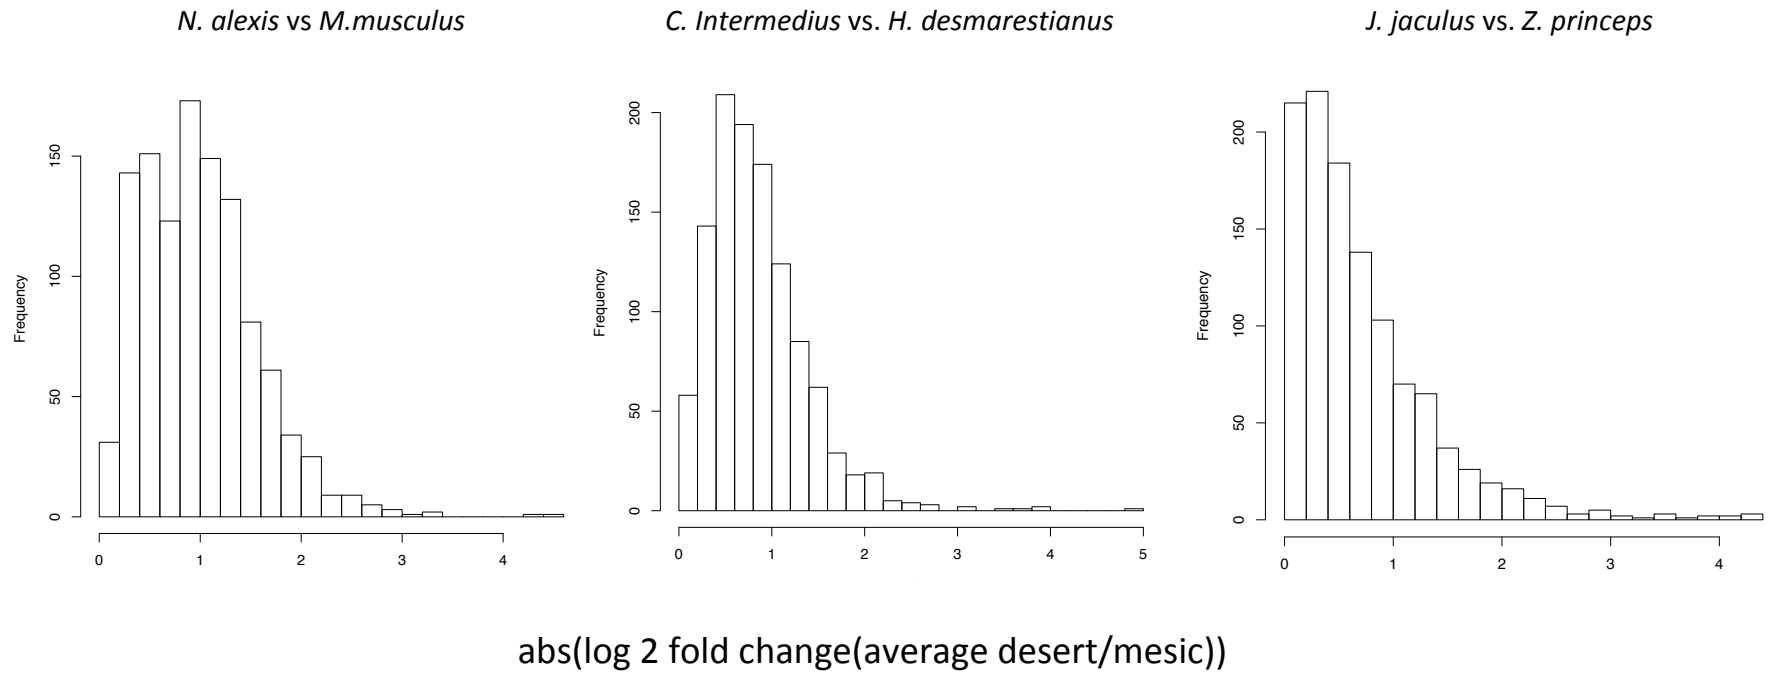

Supplement: Supplementary file [file media-1.pdf]
